# Supplementary material
Source: PubMed Central journal article supplement (PMC8356968)

# A Novel Multidrug Combination Mitigates Rat Liver Steatosis through Activating AMPK Pathway during Normothermic Machine Perfusion

## Background and methods

- Liver donor shortage
- Declined steatotic livers
- Normothermic machine Perfusion (NMP)
- Zucker rat fatty liver model
- Novel defatting drug combination

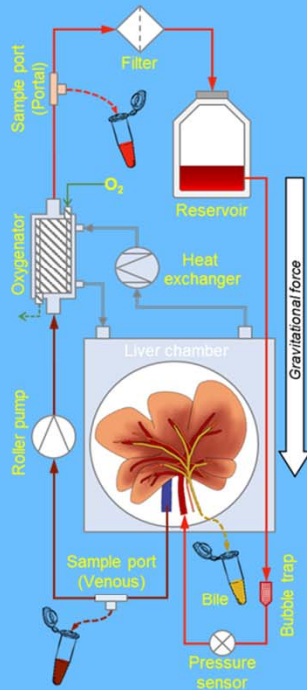

## Results

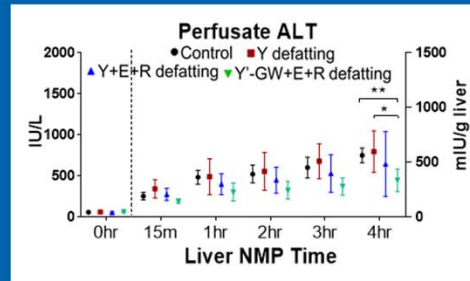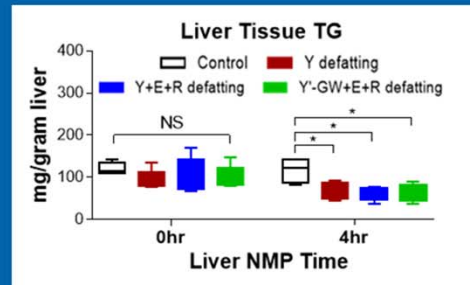

Abbreviation: TG, Triglyceride; Y, Conventional defatting drug combination; E, Epigallocatechin gallate; R, Resveratrol (\*p<0.05 or \*\*p<0.01).

## Summary

- Our novel defatting drug combination (Y'-GW+E+R) has a significant less hepatotoxicity.
- The Y'-GW+E+R defatting achieves a comparable defatting efficacy as the conventional drug combination does.
- The Y'-GW+E+R increases fat metabolism by activating AMPK pathway.

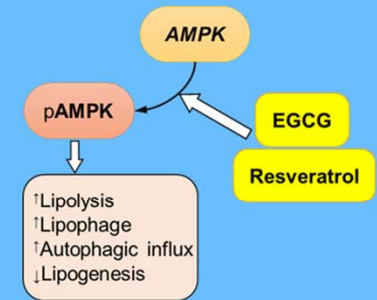

Xu M et al. *Transplantation*. Nov 2020

@TransplantJrnl

Transplantation®

Copyright © 2020 Wolters Kluwer Health, Inc. All rights reserved

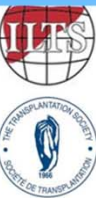

Supplement: NIHMS1728735-supplement-Visual_abstract.pdf [file NIHMS1728735-supplement-Visual_abstract.pdf]
