# Supplementary material
Source: PubMed Central journal article supplement (PMC8356968)

Supplementary Fig.1

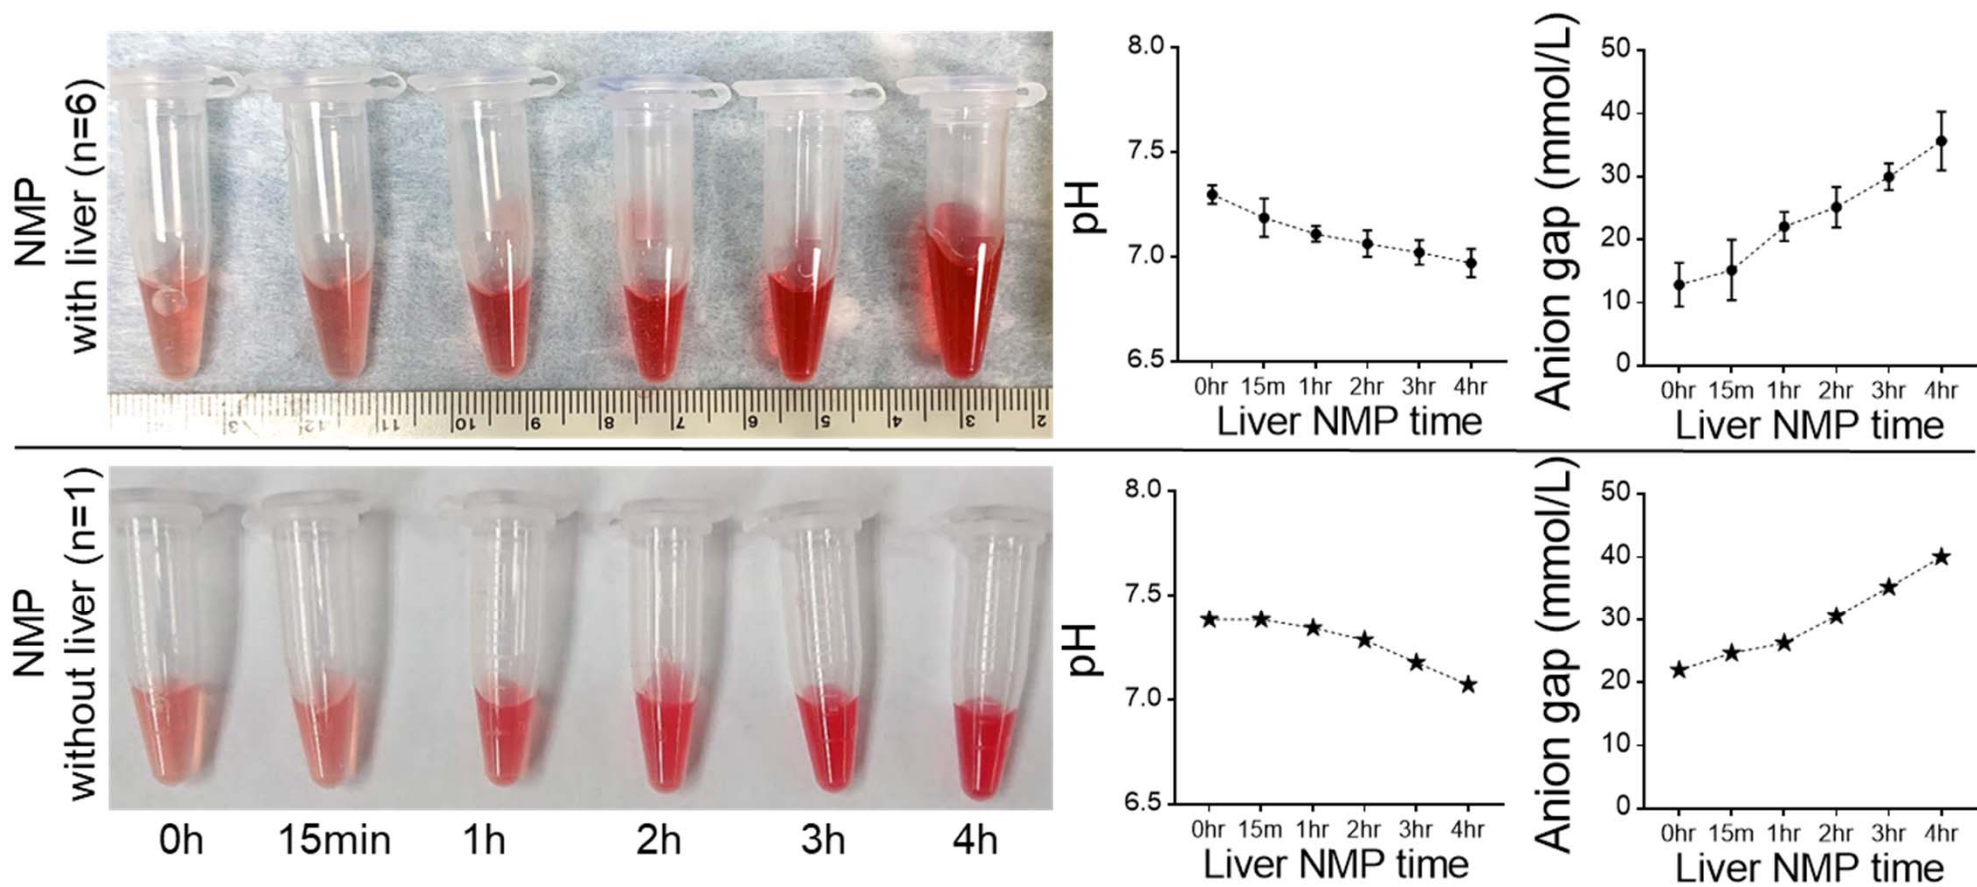

Supplement: NIHMS1728735-supplement-Supple_Figure_1.pdf [file NIHMS1728735-supplement-Supple_Figure_1.pdf]
